# Supplementary material
Source: publisher figshare collection journal article supplement (https://acs.figshare.com/ndownloader/files/3616554)
Supplement: Supplementary file 1 [file 3616554]

# Perylene as an Organic Photocatalyst for the Radical Polymerization of Functionalized Vinyl Monomers through Oxidative Quenching with Alkyl Bromides and Visible Light

Garret M. Miyake and Jordan C. Theriot

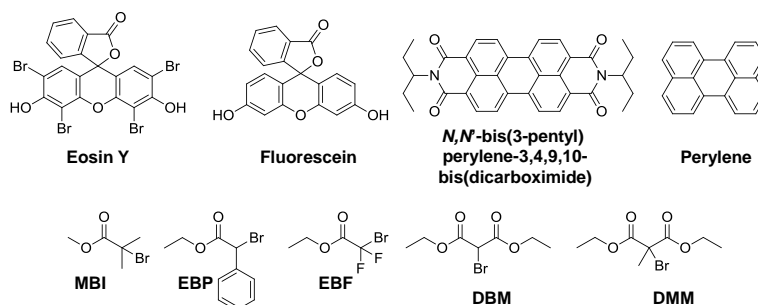**Figure SI 1.** Structures of dyes and initiators examined in this study.**Table SI 1.** Results of the Polymerization of Methyl Methacrylate.<sup>[a]</sup>

| Run No | [MMA]:[I]:[Dye] | Dye                                                            | I   | Yield (%) <sup>[b]</sup> | $M_w$ (kDa) <sup>[c]</sup> | $M_n$ (kDa) <sup>[c]</sup> | $\mathcal{D}$ ( $M_w/M_n$ ) <sup>[c]</sup> | Theo. $M_n$ (kDa) <sup>[d]</sup> | $I^*$ (EBP) (%) <sup>[e]</sup> | $I^*$ (1) (%) <sup>[f]</sup> |
|--------|-----------------|----------------------------------------------------------------|-----|--------------------------|----------------------------|----------------------------|--------------------------------------------|----------------------------------|--------------------------------|------------------------------|
| S1     | 875:9:1         | Eosin Y                                                        | MBI | Trace                    | --                         | --                         | --                                         | --                               | --                             | --                           |
| S2     | 875:9:1         | Fluorescein                                                    | MBI | 0                        | --                         | --                         | --                                         | --                               | --                             | --                           |
| S3     | 875:9:1         | <i>N,N</i> -bis(3-Pentyl) Perylene-3,4,9,10-bis(dicarboximide) | MBI | 12.9                     | 163                        | 125                        | 1.38                                       | 1.26 (11.3)                      | 1.0                            | 9.0                          |
| S4     | 875:9:1         | Perylene                                                       | MBI | 43.8                     | 78.1                       | 61.5                       | 1.27                                       | 4.26 (38.4)                      | 6.9                            | 62                           |
| S5     | 875:9:1         | Perylene                                                       | EBP | 47.9                     | 50.1                       | 35.0                       | 1.43                                       | 4.66 (41.9)                      | 13                             | 120                          |
| S6     | 875:9:1         | Perylene                                                       | EBF | 48.1                     | 67.7                       | 48.7                       | 1.39                                       | 4.68 (42.1)                      | 9.6                            | 87                           |
| S7     | 875:9:1         | Perylene                                                       | DBM | 51.8                     | 135                        | 78.0                       | 1.73                                       | 5.04 (45.4)                      | 6.5                            | 58                           |
| S8     | 875:9:1         | Perylene                                                       | DMM | 41.9                     | 51.4                       | 34.9                       | 1.47                                       | 4.08 (36.7)                      | 12                             | 105                          |

<sup>[a]</sup> Performed in 4.00 mL of DMF and with 1.00 mL (9.35 mmol, 875 equiv) of MMA, 2.7 mg (10.7  $\mu$ mol, 1 equiv) and 96.3  $\mu$ mol of the initiator specified in Table SI 1. Samples were irradiated by a white LED for 24 hours before work-up. Initiators (I) used were ethyl  $\alpha$ -bromophenylacetate (EBP), methyl  $\alpha$ -bromoisobutyrate (MBI), ethyl bromodifluoroacetate (EBF), diethyl bromomalonate (DBM), and diethyl 2-bromo-2-methylmalonate (DMM). <sup>[b]</sup> Isolated yield. <sup>[c]</sup> Determined by light-scattering. <sup>[d]</sup> Theoretical  $M_n$  calculated by [MMA]/[I] or [MMA]/[dye] (in parenthesis) \* polymer yield. Initiator efficiency ( $I^*$ ) = theoretical  $M_n$  / experimental  $M_n$  \* 100 calculated using the theoretical  $M_n$  based on [MMA]/[I]<sup>[e]</sup> or [MMA]/[dye]<sup>[f]</sup>.

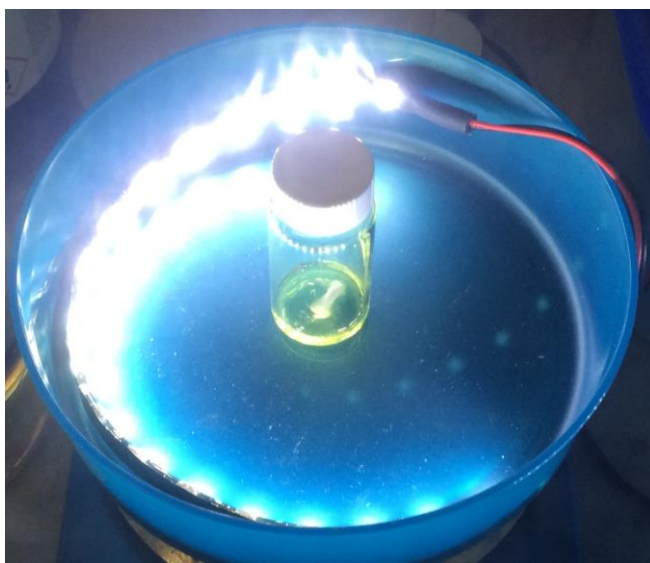

**Figure SI 2.** Photograph of experimental setup for polymerizations conducted using LED irradiation.

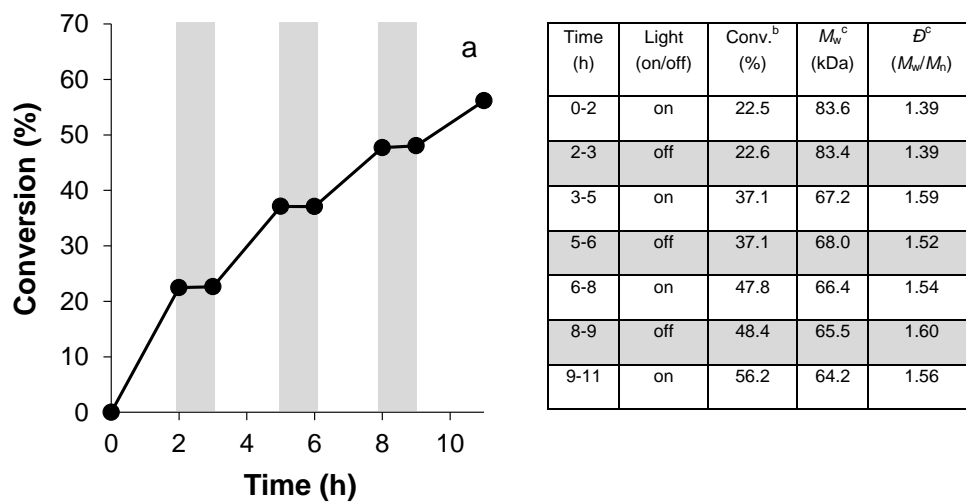

**Figure SI 3.** A plot of monomer conversion vs time (left) for the polymerization of MMA using a pulsed light sequence. A table (right) of the molecular weight properties of the polymer at each time point. Performed in 1.00 mL of DMF and 1.00 mL (0.935 mmol) MMA. [MMA]:[EBP]:[**1**] = 875:9:1.

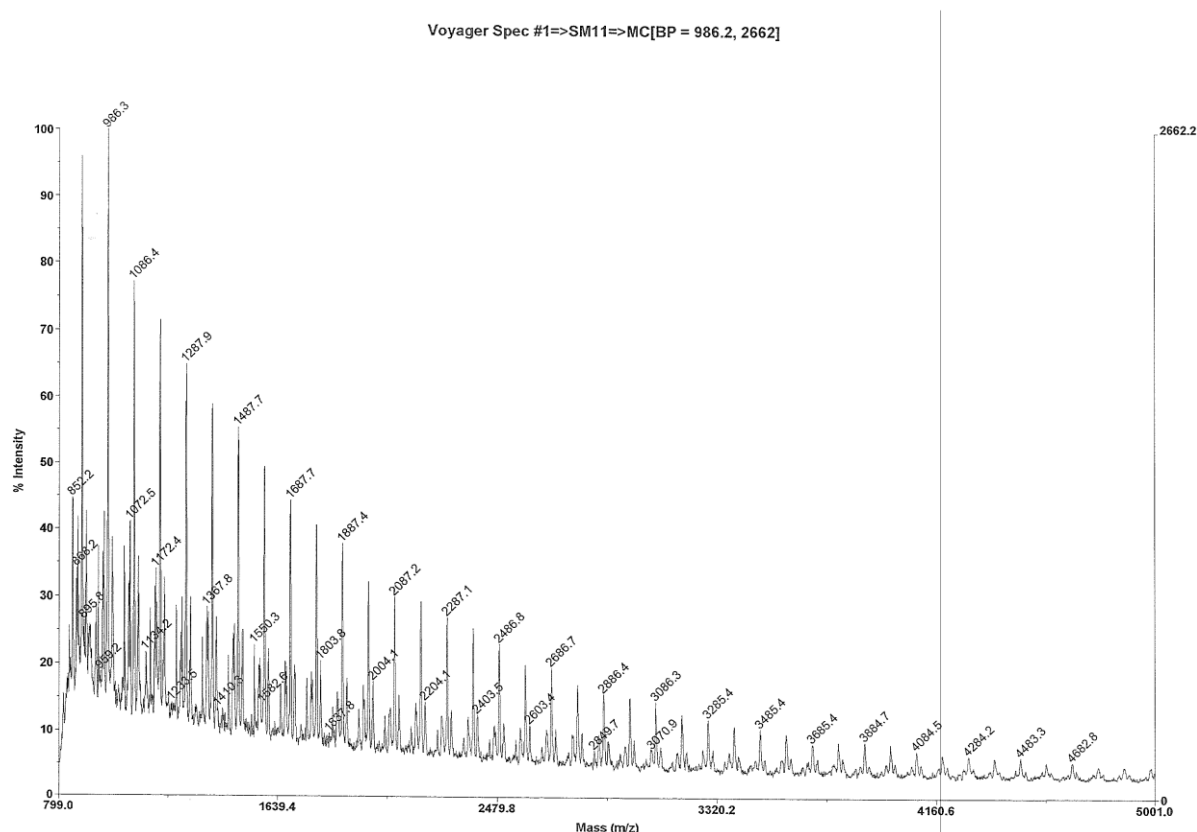

**Figure SI 4.** Spectrum from MALDI-TOF analysis of a poly(MMA) oligomer.

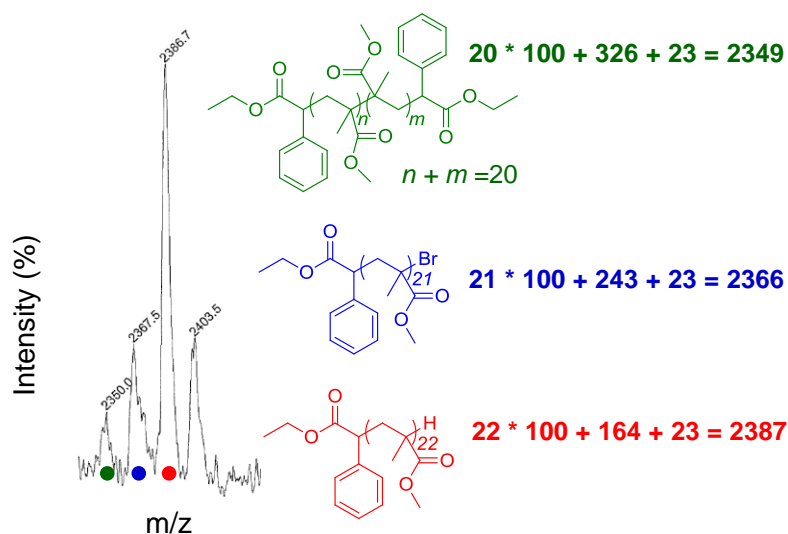

**Figure SI 5.** A portion of the MALDI-TOF spectrum with the assignment of the peaks to an oligomer with the specified number of MMA repeat units, the identified chain-end groups, and sodium (ionizing agent).

**Table SI 2.** Polymerization Results of the Chain-Extension Polymerization from a Poly(MMA) Macroinitiator.<sup>[a]</sup>

| Run No | Co-Monomer | Yield (%) <sup>[b]</sup> | $M_w$ (kDa) <sup>[c]</sup> | $M_n$ (kDa) <sup>[c]</sup> | $\bar{D}$ ( $M_w/M_n$ ) <sup>[c]</sup> |
|--------|------------|--------------------------|----------------------------|----------------------------|----------------------------------------|
| S9     | MMA        | 35.5                     | 343                        | 237                        | 1.45                                   |
| S10    | BMA        | 23.1                     | 523                        | 205                        | 2.55                                   |
| S11    | BA         | 18.1                     | 219                        | 130                        | 1.68                                   |
| S12    | S          | 9.2                      | 165                        | 119                        | 1.39                                   |

<sup>[a]</sup>Performed using the conditions described in the Experimental Section. <sup>[b]</sup>Isolated yield.

<sup>[c]</sup>Determined by light-scattering.

### Styrene Polymerization

The polymerization used the general conditions described in the Experimental Section. A 20 mL was loaded with a stir bar, 2.7 (10.7  $\mu\text{mol}$ , 1 equivalent) mg of perylene, 1.00 mL DMF, and 1.07 mL (9.31 mmol, 870 equivalents) of styrene. 16.4  $\mu\text{L}$  (93.7  $\mu\text{mol}$ , 9 equivalents) EPB was added by syringe. The polymerization was irradiated by a white LED for 23 hours before the reaction was terminated and 167 mg (17.2 %) of polystyrene was isolated as mentioned above.  $M_w = 84.5$  kDa,  $\bar{D} = 1.39$ .
